# Supplementary material for: Novel synthesis of organic nanowires and their optical propertiesElectronic supplementary information (ESI) available: experimental section and Figs. S1 and S2. See http://www.rsc.org/suppdata/cc/b1/b109881k/
Source: Royal Society of Chemistry journal article supplement (doi:10.1039/b109881k), 2002-01-09
Supplement: b109881k.doc [file b109881k.doc]

# Supplementary Information

**Experimental section:**

- Synthesis of the anodic aluminum oxide (AAO) membrane:

High purity (99.999%) aluminum plate was annealed in vacuum (500 ℃ ) for 5 hours and degreased in acetone. Aluminum foils were electropolished at 0~5 ℃ in a mixed electrolyte of perchloric acid and ethanol (20/80 by volume). The foils were then anodized galvanostatically, without current decay, in various conditions at a constant voltage.¶ When the anodization was complete, porous membrane was detached by the voltage reduction method, and washed with deionized water.

¶ Anodization condition: 5% sulfuric acid at 18 V for 20 nm diameter, 2% oxalic acid at 40 V for 70 nm, and at 60 V for 130 nm diameter nanochannels.

- Insertion of organic luminants into AAO nanochannels:

The AAO membrane was dried in vacuum at 100 ℃ for 2 hours. Organic luminants were sublimated under vacuum(~10-2 torr) for ca. 2 hours until the AAO nanochannels were completely filled. The sublimation temperature was 80~90 ℃ for pyrene and 150~160 ℃ for POPOP. After the sublimation was completed, the excess organic molecules on the surface was washed out with acetone and chloroform.

POPOP molecule


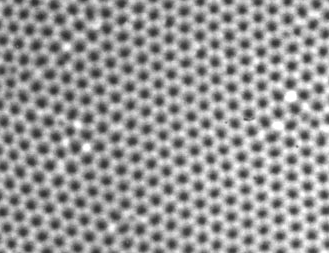

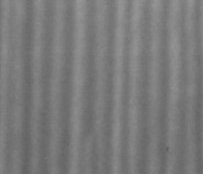


**Fig. S1** SEM micrograph of the vacant AAO membrane with 70 nm channels (scale bar = 1 m, the inset shows crosssectional view of AAO membrane.)


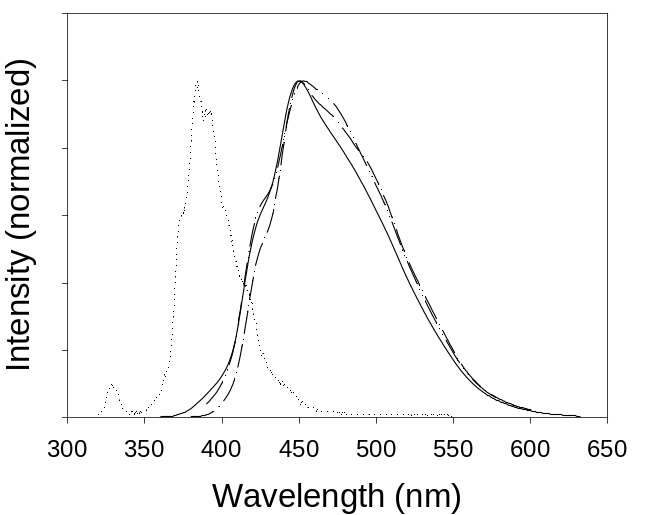


**Fig. S2** Emission spectra of various pyrene samples in the AAO membranes: in solution (dotted), 20 nm nanowires (dash-double dotted), 70 nm nanowires (dash-dotted), and bulks (solid)
